# Supplementary material for: A qualitative exploration of women’s experiences of antenatal and intrapartum care: The need for a woman-centred approach in the Peruvian Amazon
Source: PubMed Central journal article supplement (PMC6322728; doi:10.1371/journal.pone.0209736), 2019-01-07
Supplement: pone.0209736.s002.pdf [file pone.0209736.s002.pdf]

## Demographic Questionnaire

**STUDY TITLE:** Exploring women's experiences and perceptions of Antenatal and Intrapartum Care in the Peruvian Amazon: a qualitative study

**Researcher:** Harriet Marsland

**Participant Study ID Number:** \_\_\_\_\_

Please answer the following questions, indicating your answer with a tick in the box. Where prompted and appropriate, please provide more written information.

1. What is your age?

\_\_\_\_\_ years

2. How long did it take you to travel here today?

\_\_\_\_\_ minutes

3. What is your preferred language to communicate in?

Spanish       Quechua       English

4. What is your ethnicity?

Amerindian       Mestizo       White  
 Black       Japanese       Chinese

Other (please specify): \_\_\_\_\_

5. What is your current marital status?

Single       Married  
 Cohabiting/living together       Separated  
 Divorced       Widowed  
 Other (please specify): \_\_\_\_\_

6. What is the highest level of education you have completed?

11 years (primary school)  
 16 years (high school)

18 years

University

Other (please specify): \_\_\_\_\_

7. What is your current employment status?

Employed

Unemployed

If you are employed, what do you work as? \_\_\_\_\_

8. How many children do you have?

\_\_\_\_\_

9. Your last pregnancy:

a. Was this your first child?

Yes

No

b. When did you give birth?

\_\_\_\_\_

c. Where did you give birth?

\_\_\_\_\_

d. How long was your labour?

\_\_\_\_\_
