# Supplementary material for: A qualitative exploration of women’s experiences of antenatal and intrapartum care: The need for a woman-centred approach in the Peruvian Amazon
Source: PubMed Central journal article supplement (PMC6322728; doi:10.1371/journal.pone.0209736), 2019-01-07
Supplement: pone.0209736.s003.pdf [file pone.0209736.s003.pdf]

## **Topic Guide**

### **Introduction**

I am Harriet Marsland, a student from the University of Birmingham in the United Kingdom.

Thank you for agreeing to participate in this study.

#### Purpose:

- This study aims to explore women's experiences of care in pregnancy and childbirth in Iquitos.
- It is hoped that it will help to improve the quality of services provided in pregnancy.
- We plan to translate the information gathered from the study into Spanish so that it can be used in Peru for this purpose

#### Expected duration:

- It is expected that this interview will last between 30 and 60 minutes

#### Interview content:

- In the interview I will be talking to you about your experiences of antenatal care and birth

#### Data collection:

- The interview will be recorded using an audio recorder
- What we say will be written on a laptop and used as part of the research

#### Confidentiality:

- All information gathered will be kept confidential and anonymised
- Your name and other identifiable information will not be present in the written record of the interview.

#### Questions:

- Do you have any questions?

#### Consent:

- Please take the consent form and initial/sign in the relevant areas if you are in agreement with the statements.
- I'd just like to remind you that you can withdraw from the study until two days after the interview by contacting Dr Meza using the details provided on the information form
- If you wish to stop this interview at any time please just say.

### **Background Questionnaire**

Can I ask you some background questions?

(Questionnaire to be completed verbally and filled out by researcher)

- I will now turn the audio recorder on, is this still ok?

| Topic                                | Questions & Probes                                                                                                                                                                                                                                                                                                                                                                                                                                                                                                                                                                                                                                                                                                                                                                                                                                                                                                                                                                                                                                                                                                                                                                                          |
|--------------------------------------|-------------------------------------------------------------------------------------------------------------------------------------------------------------------------------------------------------------------------------------------------------------------------------------------------------------------------------------------------------------------------------------------------------------------------------------------------------------------------------------------------------------------------------------------------------------------------------------------------------------------------------------------------------------------------------------------------------------------------------------------------------------------------------------------------------------------------------------------------------------------------------------------------------------------------------------------------------------------------------------------------------------------------------------------------------------------------------------------------------------------------------------------------------------------------------------------------------------|
| <b>Experiences of antenatal care</b> | <p>Where did you receive your antenatal care?</p> <p>Who did you receive your antenatal care from?<br/>           Did you see the same person each time?<br/>           How would you describe your relationship with them?<br/>           Were they male/female?<br/>           Did you receive care off both genders?<br/>           How did you feel about this?<br/>           If both – in which situation did you feel most comfortable?<br/>           Why do you think this might have been?<br/>           Would you have liked to have seen anybody else?</p> <p>Would you have liked any more or less appointments?<br/>           Why? When did you have your appointments?<br/>           At what stage would you have liked to have more appointments?</p> <p>How much information were you given about your pregnancy and caring for your child?<br/>           Who gave this to you and at what stage?<br/>           Did you receive enough information?<br/>           No – what more information would you have liked?<br/>           Who would you have liked to have received this information from?<br/>           What would have been the best way to receive this information?</p> |
| <b>Knowledge of antenatal care</b>   | <p>How important do you think antenatal care is?<br/>           Why do you think this?</p> <p>Do you know what problems might occur without this care?<br/>           Where did you gain this information?</p> <p>What do you believe is involved in care during pregnancy?<br/>           Do you know what is carried out at each appointment?<br/>           Do you know the purpose of these tests?</p>                                                                                                                                                                                                                                                                                                                                                                                                                                                                                                                                                                                                                                                                                                                                                                                                  |

|                                                                                                                            |                                                                                                                                                                                                                                                                                                                                                                                                                                                                                                                                                                                                                                                                                                                                                                                                                                                                                                                                                                                                                                                                                                                                                                       |
|----------------------------------------------------------------------------------------------------------------------------|-----------------------------------------------------------------------------------------------------------------------------------------------------------------------------------------------------------------------------------------------------------------------------------------------------------------------------------------------------------------------------------------------------------------------------------------------------------------------------------------------------------------------------------------------------------------------------------------------------------------------------------------------------------------------------------------------------------------------------------------------------------------------------------------------------------------------------------------------------------------------------------------------------------------------------------------------------------------------------------------------------------------------------------------------------------------------------------------------------------------------------------------------------------------------|
| <p style="writing-mode: vertical-rl; transform: rotate(180deg);"><b>Barriers, difficulties, motivators or enablers</b></p> | <p>Describe what would normally happen on the day of an appointment<br/> How do you get to the clinic?<br/> How easy is it to get to the clinic for your appointment?<br/> Who attends appointments with you?</p> <p>What factors made you attend your appointments?<br/> What might have stopped you from attending your appointment?<br/> Why might this have stopped you?<br/> How could you avoid/overcome these factors?</p> <p>How was your antenatal care funded?<br/> Do you find it difficult to afford the care?<br/> Would you be more likely to attend if it was paid for?</p> <p>What could be done to make it easier for women to attend antenatal care appointments?</p> <p>Who played a part in your decisions about antenatal care?<br/> Who gave you information and educated you on your pregnancy?<br/> What was your husband's role during the pregnancy?</p> <p>How easy is it to get an appointment at the centre?<br/> How far in advance can you organize this?<br/> Do you get told when you need to come in for your next appointment? How to know to come in for another? Reminders?<br/> If not offered, would you find this useful?</p> |
| <p style="writing-mode: vertical-rl; transform: rotate(180deg);"><b>Satisfaction of antenatal care</b></p>                 | <p>What were the best/worst aspects of the antenatal care that you received?<br/> Why? What would you have liked to have been done differently?</p> <p>If applicable, how does this experience compare to previous pregnancies?<br/> Did you have the same number of appointments?<br/> Did you feel like you received any less care?</p> <p>Do you think that you benefitted from the care that you received during your pregnancy?<br/> Why?</p>                                                                                                                                                                                                                                                                                                                                                                                                                                                                                                                                                                                                                                                                                                                    |

**Experience of Intrapartum care**

Describe your experience of the care you received during childbirth.  
How long were you kept in the healthcare facility for?  
Were there any complications?  
How were these dealt with?

What are your opinions on pain relief in pregnancy?  
Did you receive any pain relief or medication?  
Have you used it previously/would you use it again and why?  
If no – would you have liked to?

What were your thoughts and feelings during labour?  
Why did you feel this way?

Who were the main people supporting/caring for you during labour?  
Family/friends  
Staff (what was this relationship like?)  
How many staff looked after you? Do you know what their roles were?

What was your opinion of the area in which you gave birth?  
Did you have any concerns?  
Did you feel comfortable and relaxed? Why?

If this was your first pregnancy:  
Was the pregnancy different to what you had expected?  
If so how? Why do you think this was?

Do you think home or healthcare centre births are better?  
Why do you think this?  
If you were to have the choice where would you like to give birth?  
Before this birth, what was your preference?/Has your opinion of this changed at all?

**Satisfaction of Intrapartum Care**

What were the best/worst aspects of your delivery?  
Why? What would you have liked to have been done differently?  
How do you think your experience could be improved?  
Did you feel like you knew what was happening throughout the delivery?  
Were there any points where you felt you didn't what you should be doing?

If you have given birth more than once:  
How does this experience compare to previous pregnancies?  
In what ways?  
Why do you think it might have been different?  
Did you feel like you received any less care/support?

Do you think that you benefitted from the care that you received during birth?  
Why?

Would you recommend this care facility and staff to friends/family?  
Would you attend this centre again for delivery?
