# Supplementary material for: A qualitative exploration of women’s experiences of antenatal and intrapartum care: The need for a woman-centred approach in the Peruvian Amazon
Source: PubMed Central journal article supplement (PMC6322728; doi:10.1371/journal.pone.0209736), 2019-01-07
Supplement: pone.0209736.s004.pdf [file pone.0209736.s004.pdf]

### **Basic Outline of Antenatal Care**

|                             |             |
|-----------------------------|-------------|
| 1 <sup>st</sup> appointment | <14 weeks   |
| 2 <sup>nd</sup> appointment | 14-21 weeks |
| 3 <sup>rd</sup> appointment | 22-24 weeks |
| 4 <sup>th</sup> appointment | 25-32 weeks |
| 5 <sup>th</sup> appointment | 33-36 weeks |
| 6 <sup>th</sup> appointment | 37-40 weeks |

This is the basic outline of antenatal care as recommended and documented by the Ministerio de Salud Peru, December 2013.
