# Supplementary material for: A qualitative exploration of women’s experiences of antenatal and intrapartum care: The need for a woman-centred approach in the Peruvian Amazon
Source: PubMed Central journal article supplement (PMC6322728; doi:10.1371/journal.pone.0209736), 2019-01-07
Supplement: pone.0209736.s005.pdf [file pone.0209736.s005.pdf]

**Manuscript:** A qualitative exploration of women’s experiences of antenatal and intrapartum care: the need for a woman-centred approach in the Peruvian Amazon.

Harriet Marsland, Graciela Meza, Gilles de Wildt, Laura L. Jones.

**Consolidated criteria for reporting qualitative studies (COREQ):  
32-item checklist**

Developed from:

Tong A, Sainsbury P, Craig J. Consolidated criteria for reporting qualitative research (COREQ): a 32-item checklist for interviews and focus groups. *International Journal for Quality in Health Care*. 2007. Volume 19, Number 6: pp. 349 – 357

| No. Item                                       | Guide questions/description                             | Reported on Page #                                                                                                                                                                                  |
|------------------------------------------------|---------------------------------------------------------|-----------------------------------------------------------------------------------------------------------------------------------------------------------------------------------------------------|
| <b>Domain 1: Research team and reflexivity</b> |                                                         |                                                                                                                                                                                                     |
| <i>Personal Characteristics</i>                |                                                         |                                                                                                                                                                                                     |
| 1. Inter viewer/facilitator                    | Which author/s conducted the inter view or focus group? | Harriet Marsland                                                                                                                                                                                    |
| 2. Credentials                                 | What were the researcher’s credentials?<br>E.g. PhD, MD | Harriet Marsland, BMedSc (Hons)<br><br>Dr Gilles de Wildt, MRCP, MSc<br><br>Dr Graciela Meza, MC, MSP<br><br>Dr Laura Jones, BSc (Hons), PhD                                                        |
| 3. Occupation                                  | What was their occupation at the time of the study?     | Harriet Marsland, International Health/Medical Student, University of Birmingham<br><br>Dr Gilles de Wildt, General practitioner, International Health BMedSci Course Lead University of Birmingham |

|                                             |                                                                                                                                           |                                                                                                                                                                                                                                     |
|---------------------------------------------|-------------------------------------------------------------------------------------------------------------------------------------------|-------------------------------------------------------------------------------------------------------------------------------------------------------------------------------------------------------------------------------------|
|                                             |                                                                                                                                           | <p>Dr Graciela Meza,<br/>Full Time Assistant Professor, Facultad Medicina, Iquitos, General Practitioner</p> <p>Dr Laura Jones,<br/>Lecturer in Qualitative and Mixed-Methods Applied Health Research, University of Birmingham</p> |
| 4. Gender                                   | Was the researcher male or female?                                                                                                        | Female                                                                                                                                                                                                                              |
| 5. Experience and training                  | What experience or training did the researcher have?                                                                                      | Methods – the researcher had previously carried out a small scale practice qualitative study as part of her intercalated degree at University of Birmingham.                                                                        |
| <i>Relationship with participants</i>       |                                                                                                                                           |                                                                                                                                                                                                                                     |
| 6. Relationship established                 | Was a relationship established prior to study commencement?                                                                               | No                                                                                                                                                                                                                                  |
| 7. Participant knowledge of the interviewer | What did the participants know about the researcher? e.g. personal goals, reasons for doing the research                                  | Information provided on Participant Information Sheet and prior to each interview (see S1 and S3)                                                                                                                                   |
| 8. Interviewer characteristics              | What characteristics were reported about the interviewer/facilitator? e.g. Bias, assumptions, reasons and interests in the research topic | Participant Information Sheet S1 and Methods                                                                                                                                                                                        |

|                                          |                                                                                                                                                          |                             |
|------------------------------------------|----------------------------------------------------------------------------------------------------------------------------------------------------------|-----------------------------|
| <b>Domain 2: study design</b>            |                                                                                                                                                          |                             |
| <i>Theoretical framework</i>             |                                                                                                                                                          |                             |
| 9. Methodological orientation and Theory | What methodological orientation was stated to underpin the study? e.g. grounded theory, discourse analysis, ethnography, phenomenology, content analysis | Methods                     |
| <i>Participant selection</i>             |                                                                                                                                                          |                             |
| 10. Sampling                             | How were participants selected? e.g. purposive, convenience, consecutive, snowball                                                                       | Methods                     |
| 11. Method of approach                   | How were participants approached? e.g. face-to-face, telephone, mail, email                                                                              | Methods                     |
| 12. Sample size                          | How many participants were in the study?                                                                                                                 | Methods                     |
| 13. Non-participation                    | How many people refused to participate or dropped out? Reasons?                                                                                          | No participants dropped out |
| <i>Setting</i>                           |                                                                                                                                                          |                             |
| 14. Setting of data collection           | Where was the data collected? e.g. home, clinic, workplace                                                                                               | Methods                     |
| 15. Presence of non-participants         | Was anyone else present besides the participants and researchers?                                                                                        | Methods                     |
| 16. Description of sample                | What are the important characteristics of the sample? e.g. demographic data, date                                                                        | Table 1                     |
| <i>Data collection</i>                   |                                                                                                                                                          |                             |
| 17. Interview guide                      | Were questions, prompts, guides provided by the authors? Was it pilot tested?                                                                            | See S3                      |
| 18. Repeat interviews                    | Were repeat inter views carried out? If yes, how many?                                                                                                   | No                          |
| 19. Audio/visual recording               | Did the research use audio or visual recording to collect the data?                                                                                      | Methods                     |

|                                        |                                                                                                                                 |                                     |
|----------------------------------------|---------------------------------------------------------------------------------------------------------------------------------|-------------------------------------|
| 20. Field notes                        | Were field notes made during and/or after the inter view or focus group?                                                        | No                                  |
| 21. Duration                           | What was the duration of the inter views or focus group?                                                                        | Results                             |
| 22. Data saturation                    | Was data saturation discussed?                                                                                                  | Methods                             |
| 23. Transcripts returned               | Were transcripts returned to participants for comment and/or correction?                                                        | No                                  |
| <b>Domain 3: analysis and findings</b> |                                                                                                                                 |                                     |
| <i>Data analysis</i>                   |                                                                                                                                 |                                     |
| 24. Number of data coders              | How many data coders coded the data?                                                                                            | Methods                             |
| 25. Description of the coding tree     | Did authors provide a description of the coding tree?                                                                           | No                                  |
| 26. Derivation of themes               | Were themes identified in advance or derived from the data?                                                                     | Methods                             |
| 27. Software                           | What software, if applicable, was used to manage the data?                                                                      | None                                |
| 28. Participant checking               | Did participants provide feedback on the findings?                                                                              | No                                  |
| <i>Reporting</i>                       |                                                                                                                                 |                                     |
| 29. Quotations presented               | Were participant quotations presented to illustrate the themes/findings? Was each quotation identified? e.g. participant number | Embedded throughout results section |
| 30. Data and findings consistent       | Was there consistency between the data presented and the findings?                                                              | Results and Discussion              |
| 31. Clarity of major themes            | Were major themes clearly presented in the findings?                                                                            | Results                             |
| 32. Clarity of minor themes            | Is there a description of diverse cases or discussion of minor themes?                                                          | Results                             |
